# Supplementary material for: Supercritical carbon dioxide extraction of essential oils from leaves of Eucalyptus globulus L., their analysis and application
Source: Royal Society of Chemistry journal article supplement (doi:10.1039/c5ay02009c), 2016-01-01
Supplement: c5ay02009c1.pdf [file c5ay02009c1.pdf]

## Supercritical Carbon-dioxide Extraction of essential oil from leaves of *Eucalyptus globulus* L., Analysis and their Application

Aarti Singh, Anees Ahmad\*, Rani Bushra

Department of Chemistry, Aligarh Muslim University, Aligarh, UP, India

E-mail: as87822@gmail.com

### Supplementary information

**Fig. S1:** Calibration plot for total phenolic contents using Gallic acid as standard

**Fig. S2:** Comparative study of phenolic contents in essential oil of *E. globulus* extracted by different extraction techniques

**Fig. S3:** Comparative study of anthocyanin contents in essential oil of *E. globulus* extracted by different extraction techniques

**Fig. S4:** Comparative spectra of different oils of *E. globulus* L. extracted using different extraction techniques A: Solvent extracted oil, B: Ultra sonication oil, C: Hydrodistilled oil, D: SFE oil

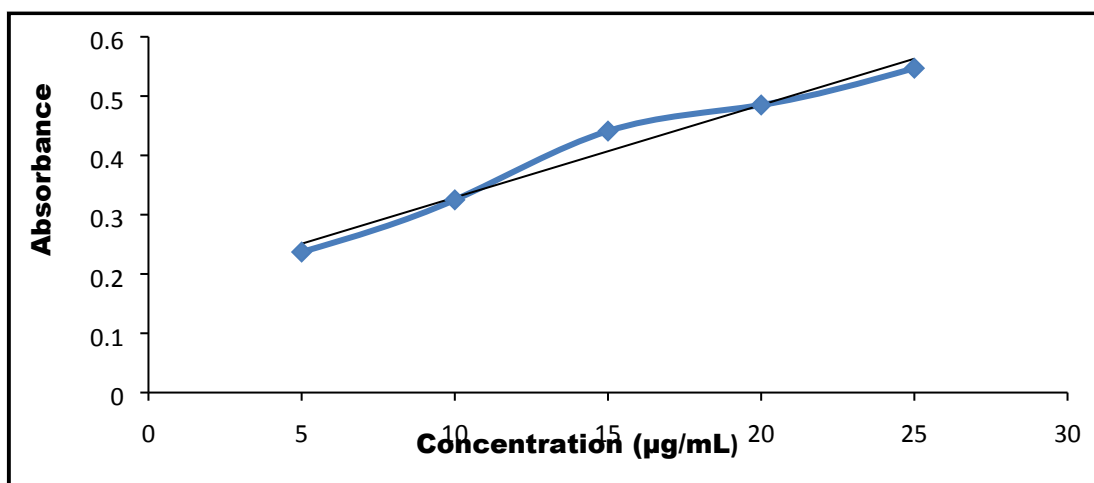

Fig. S1

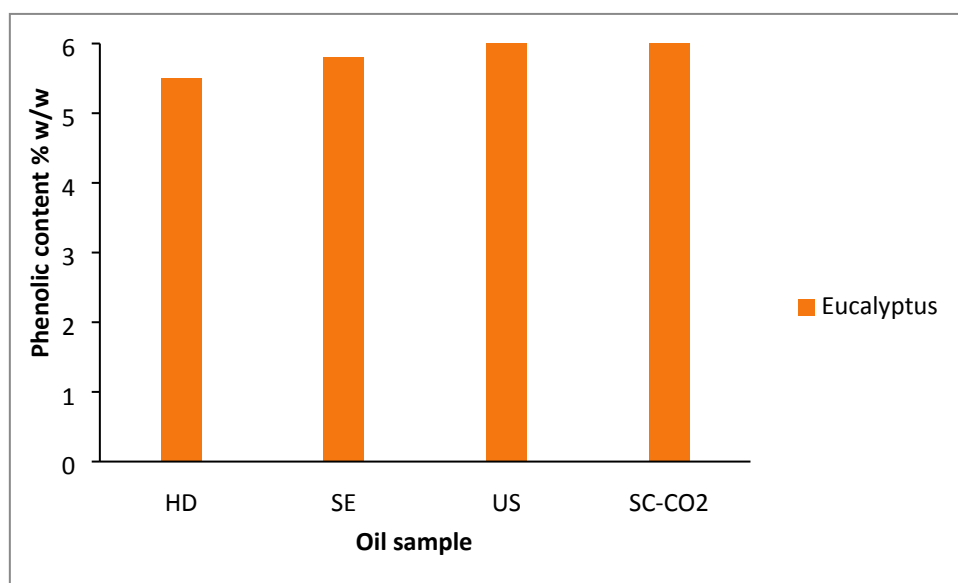

Fig. S2

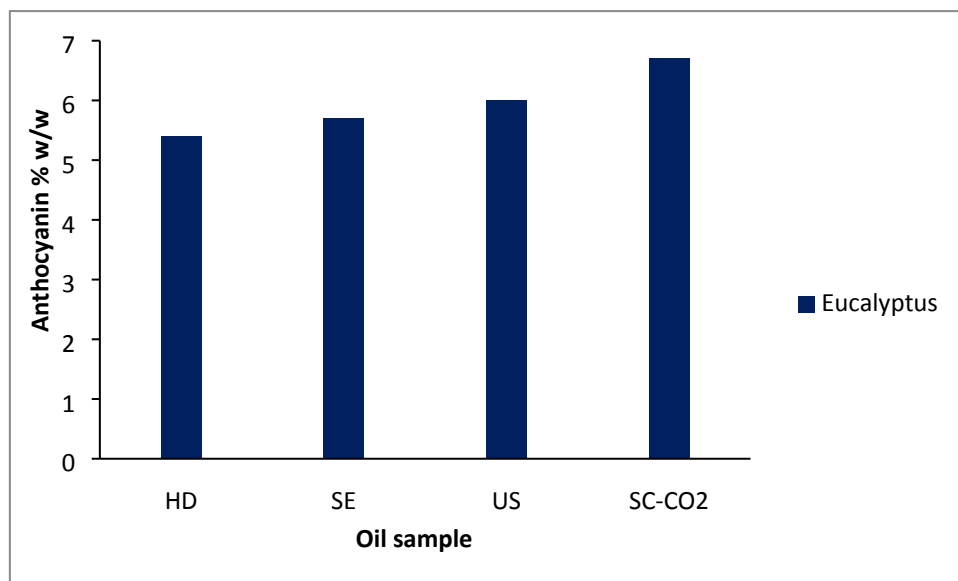

**Fig. S3**

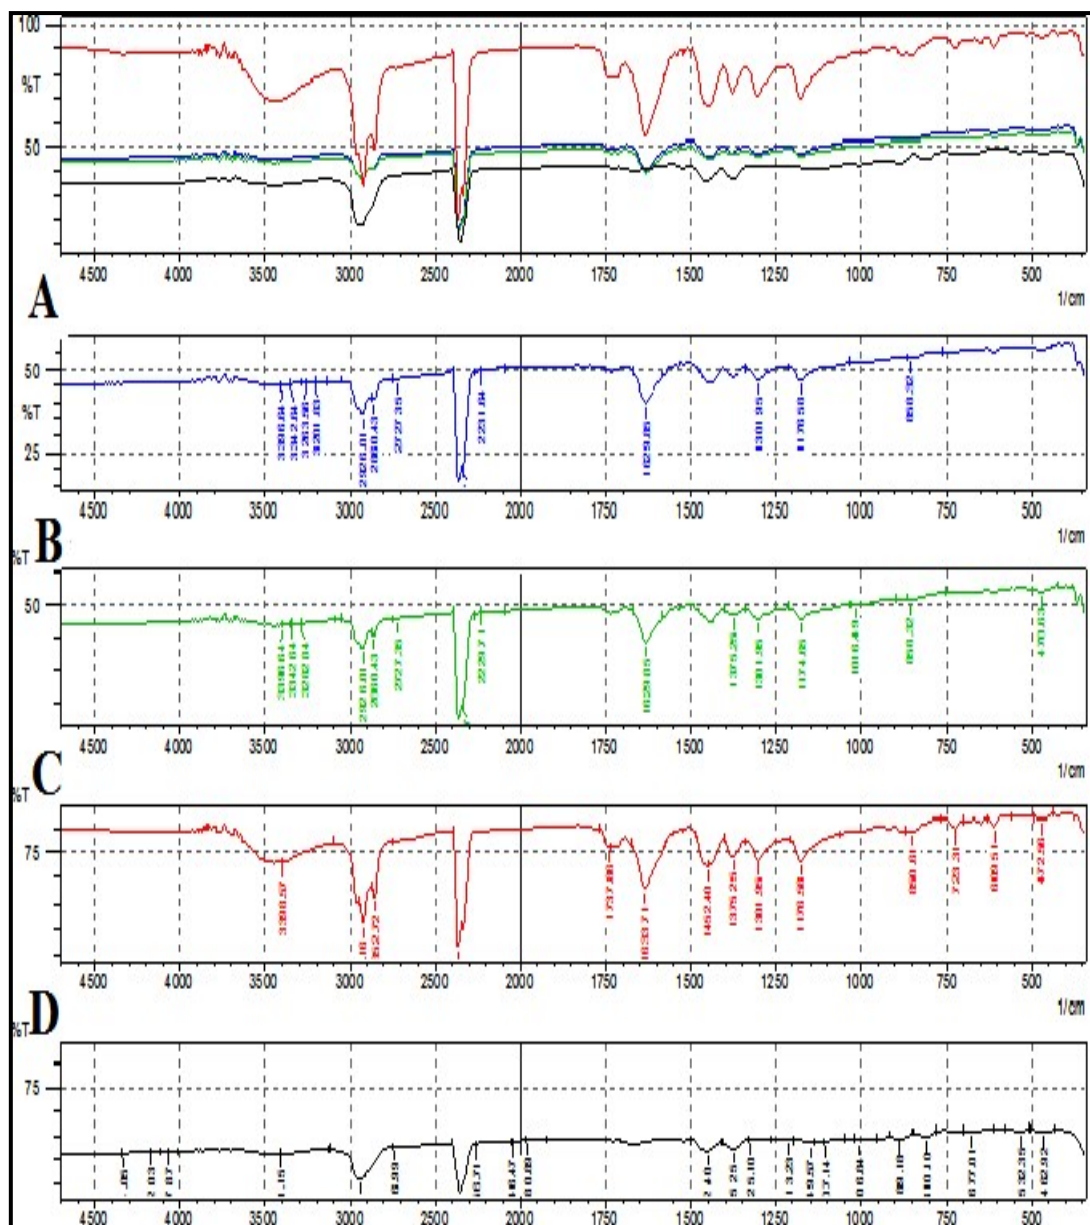

Fig. S4

**Table S1. Physicochemical characterization of essential oil**

| <i>E. globulus</i><br>(dried leaves)<br>oil  | HD*                       | SE*                       | US*                       | SC-CO <sub>2</sub> *      | Reported<br>value <sup>32</sup> |
|----------------------------------------------|---------------------------|---------------------------|---------------------------|---------------------------|---------------------------------|
| <b>specific gravity (25°C)</b>               | 0.899                     | 0.880                     | 0.878                     | 0.899                     | 0.906-0.925                     |
| <b>refractive index (25°C)</b>               | 1.44                      | 1.460                     | 1.459                     | 1.65                      | 1.458-1.470                     |
| <b>Optical rotation (25°C)</b>               | -3.9°                     | -4°                       | -7.1°                     | -3.9°                     | -2° to +5°                      |
| <b>Solubility in alcohol (% v/v ethanol)</b> | Clearly soluble in 5.0 mL | Clearly soluble in 5.0 mL | Clearly soluble in 4.5 mL | Clearly soluble in 4.4 mL | Soluble in 4 mL of 70% ethanol  |
| <b>Acid value (Mean±SD*)</b>                 | 5.8±0.2                   | 6.0±0.5                   | 5.9±0.2                   | 5.4±0.1                   | -                               |
| <b>Ester value (Mean±SD*)</b>                | 9.1±0.1                   | 9.9±0.2                   | 9.6±0.1                   | 8.5±0.1                   | -                               |
| <b>Aldehyde content (% w/v)</b>              | 2.5                       | 3                         | 3.1                       | 3.4                       | -                               |
| <b>Phenolics in %w/w (Mean ± SD*)</b>        | 5.5±0.2                   | 5.8±0.1                   | 6.0±0.08                  | 6.3±0.1                   | -                               |
| <b>Anthocyanin content %w/w (Mean ± SD*)</b> | 5.4±0.1                   | 5.7±0.1                   | 6.0±0.1                   | 6.7±0.08                  | -                               |

HD\*Hydrodistillation, SE\*Solvent extraction, US\*Ultrasonication, SC-CO<sub>2</sub>\*Supercritical carbon dioxide extraction

**Table S2. SC-CO<sub>2</sub> table for extraction parameters of *E. globulus* L.**

| S. No. | Pressure (bar) | Temperature (°C) | Flow rate (g min <sup>-1</sup> ) | Amount (gm) | Time (min) | Yield (% v/w) |
|--------|----------------|------------------|----------------------------------|-------------|------------|---------------|
| 1.     | 350            | 80               | 12                               | 80          | 60         | 3.6           |
| 2.     | 350            | 40               | 8                                | 50          | 60         | 2.8           |
| 3.     | 100            | 40               | 8                                | 80          | 60         | 0.04          |
| 4.     | 350            | 40               | 12                               | 50          | 120        | 2.5           |
| 5.     | 100            | 40               | 12                               | 80          | 120        | 0.065         |
| 6.     | 350            | 80               | 12                               | 50          | 120        | 3.24          |
| 7.     | 350            | 40               | 12                               | 80          | 60         | 2.91          |
| 8.     | 350            | 40               | 8                                | 80          | 60         | 1.52          |
| 9.     | 200            | 80               | 10                               | 70          | 90         | 1.81          |
| 10.    | 350            | 80               | 12                               | 80          | 120        | 3.32          |
| 11.    | 100            | 80               | 8                                | 50          | 60         | 0.064         |
| 12.    | 350            | 80               | 8                                | 50          | 60         | 1.56          |
| 13.    | 200            | 60               | 10                               | 70          | 90         | 1.32          |
| 14.    | 350            | 40               | 12                               | 50          | 60         | 2.52          |
| 15.    | 100            | 40               | 8                                | 80          | 120        | 0.31          |
| 16.    | 200            | 60               | 10                               | 70          | 90         | 2.93          |
| 17.    | 100            | 80               | 12                               | 80          | 120        | 0.09          |
| 18.    | 350            | 80               | 12                               | 50          | 60         | 3.04          |
| 19.    | 100            | 40               | 12                               | 80          | 120        | 0.14          |
| 20.    | 350            | 40               | 12                               | 80          | 120        | 2.58          |
| 21.    | 350            | 80               | 8                                | 80          | 120        | 1.13          |
| 22.    | 100            | 80               | 8                                | 50          | 120        | 0.03          |
| 23.    | 100            | 80               | 12                               | 50          | 60         | 0.06          |
| 24.    | 100            | 40               | 8                                | 50          | 120        | 0.021         |
| 25.    | 100            | 40               | 12                               | 50          | 120        | 0.05          |
| 26.    | 200            | 60               | 10                               | 70          | 90         | 1.62          |
| 27.    | 100            | 40               | 8                                | 50          | 60         | 0.04          |
| 28.    | 100            | 80               | 8                                | 80          | 120        | 0.034         |
| 29.    | 100            | 80               | 8                                | 80          | 60         | 0.051         |
| 30.    | 100            | 80               | 12                               | 50          | 120        | 0.09          |
| 31.    | 350            | 80               | 8                                | 80          | 120        | 1.2           |
| 32.    | 350            | 40               | 8                                | 80          | 120        | 1.32          |
| 33.    | 350            | 80               | 8                                | 50          | 120        | 1.04          |
| 34.    | 100            | 40               | 12                               | 50          | 60         | 0.031         |
| 35.    | 100            | 80               | 12                               | 80          | 60         | 0.065         |
| 36.    | 350            | 40               | 8                                | 50          | 120        | 1.21          |

**Table S3. Solvent system tried for separation of phytoconstituents of essential oil**

| <b>S.no</b> | <b>Solvent system</b>                        | <b>Ratio (v/v/v)</b> | <b>Observation</b>     |
|-------------|----------------------------------------------|----------------------|------------------------|
| 1.          | Hexane : dichloromethane                     | 95 : 5               | No separation          |
| 2.          | Toulene : diisopropyl ether : ethyl acetate  | 80 : 10 : 10         | No separation          |
| 3.          | Toulene : diisopropyl ether                  | 95 : 5               | No separation          |
| 4.          | Petroleum ether : ethylacetate : formic acid | 95 : 5 : 1           | No separation          |
| 5.          | Cyclohexane : ethylacetate                   | 90 : 10              | No separation          |
| 6.          | Chloroform : methanol : formic acid          | 90 : 2 : 1           | Little separation      |
| 7.          | Chloroform : methanol : formic acid          | 90: 3:1              | Little separation      |
| 8.          | Chloroform : methanol : formic acid          | 90: 1:1              | Little separation      |
| 9.          | Toulene : methanol : formic acid             | 90 : 7.5 : 1         | Little separation      |
| 10.         | Toulene : methanol : formic acid             | 90:6:1               | Little separation      |
| 11.         | Toulene : chloroform : formic acid           | 90 : 2 : 1           | Little separation      |
| 12.         | Toulene : acetone                            | 95 : 5               | No separation          |
| 13.         | Toulene : ethyl acetate                      | 97 : 5               | Fair                   |
| 14.         | Toulene : ethyl acetate                      | 97 : 3               | Fair                   |
| 15.         | Toulene : ethyl acetate: formic acid         | 95 :5:1              | Fair                   |
| 16.         | Hexane : ethyl acetate : formic acid         | 90:1:1               | Good separation        |
| 17.         | Hexane : ethyl acetate : formic acid         | 70: 30 : 1           | Good separation        |
| 18.         | <b>Hexane : ethyl acetate : formic acid</b>  | <b>70: 20 : 1</b>    | <b>Best separation</b> |

**Table S4. Results of FTIR analysis of *E. globulus* L. oil extracted by different techniques**

| S.no | Peak    | Functional group                 | Intensity               | HD* | SE* | US* | SC-CO <sub>2</sub> * |
|------|---------|----------------------------------|-------------------------|-----|-----|-----|----------------------|
| 1    | 858.32  | Aromatic p-disubstituted benzene | Strong                  | -   | +   | +   | -                    |
| 2    | 1174.65 | C-F(fluoroalkane)                | Strong, broad           | -   | +   | +   | +                    |
| 3    | 1301.95 | C-O( ether)                      | Strong,stretch          | -   | +   | +   | +                    |
| 4    | 1375.95 | N-O(nitro,aliphatic)             | weaker                  | +   | +   | -   | +                    |
| 5    | 1452.4  | C=C(aromatic)                    | Stretch,medium - strong | +   | -   | -   | +                    |
| 6    | 1629.85 | C-C(conjugated diene)            | Strong                  | -   | +   | +   | -                    |
| 7    | 2229.71 | -C=-C(alkyne)                    | Stretch,strong          | -   | +   | +   | -                    |
| 8    | 2926.43 | methylene                        | Medium - strong         | -   | +   | +   | -                    |
| 9    | 3342.64 | O-H(alcohol)                     | Strong, broad           | -   | +   | +   | -                    |

HD\*Hydrodistillation, SE\*Solvent extraction, US\*Ultrasonication, SC-CO<sub>2</sub>\* Supercritical carbon dioxide extraction
